# Supplementary material
Source: Springer Nature journal article supplement (https://www.springermedizin.de/resource/supplementary/13054_2013_2906_MOESM1_ESM.pdf/9712666)

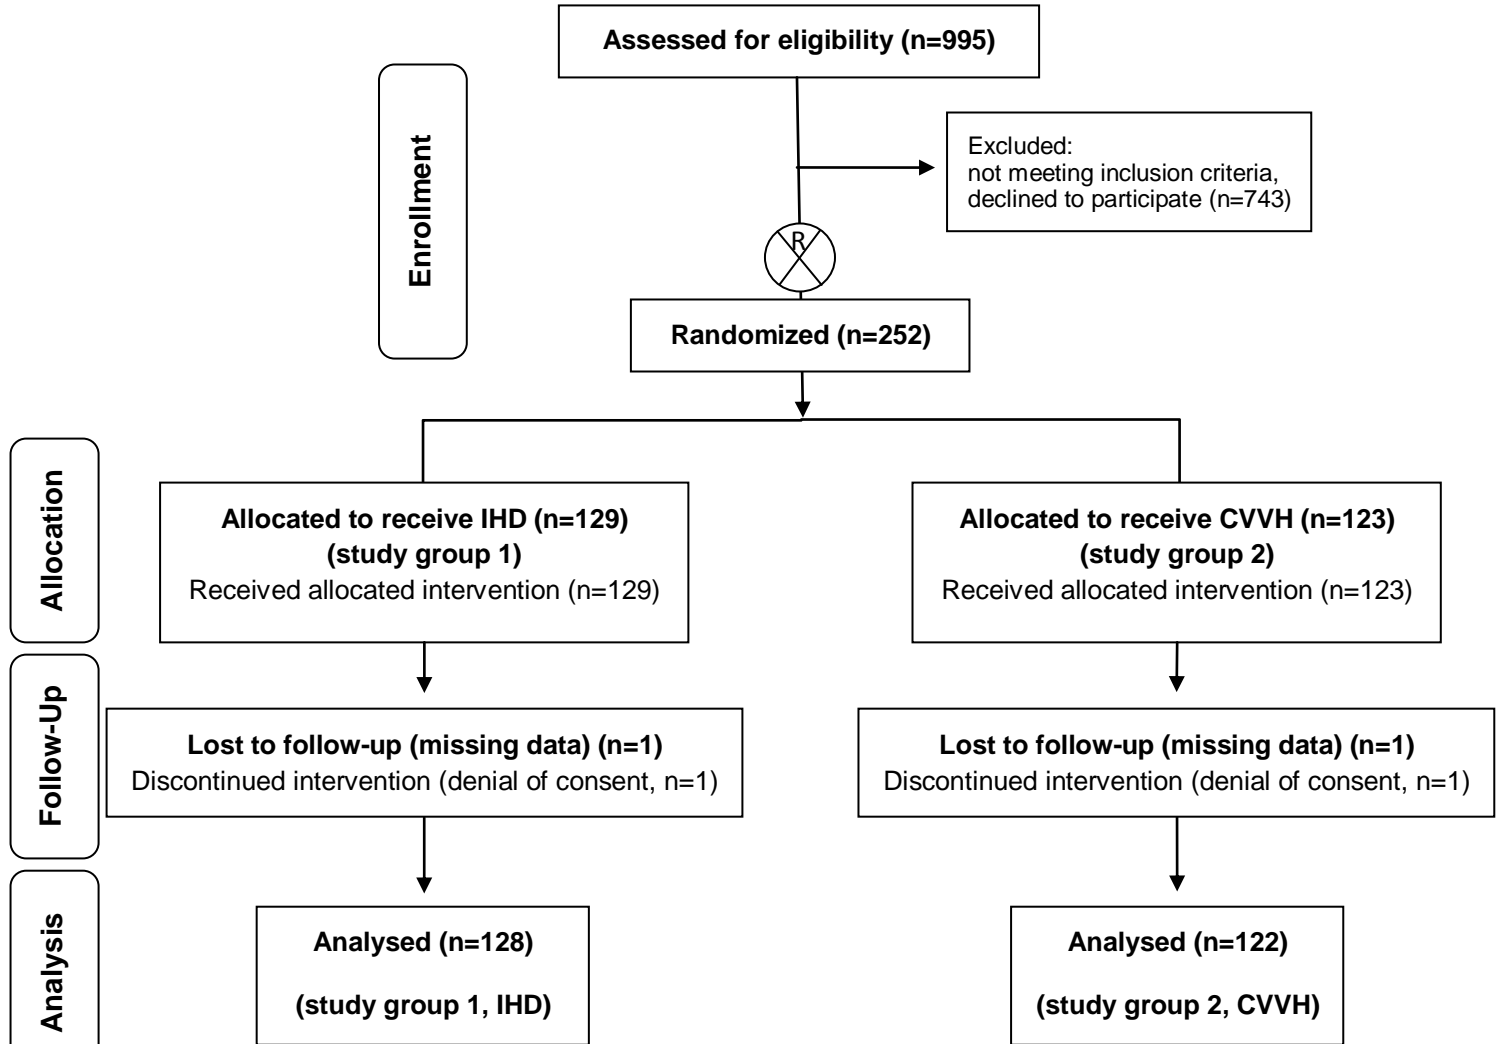

Supplement: MOESM1 [file 9712666]
